# Inflammatory Basis of Pulmonary Arterial Hypertension

## Implications for Perioperative and Critical Care Medicine

Neil M. Goldenberg, M.D., Ph.D., Marlene Rabinovitch, M.D., Benjamin E. Steinberg, M.D., Ph.D.

Pulmonary hypertension, defined as a resting mean pulmonary artery pressure greater than or equal to 25 mmHg, results from a myriad of conditions. The Fifth World Symposium on Pulmonary Hypertension proposed a classification system that organizes pulmonary hypertension into five groups based on common hemodynamic, pathophysiologic, and therapeutic parameters.<sup>1</sup> This review focuses on pulmonary arterial hypertension (Group 1 pulmonary hypertension), a disease in which progressive pulmonary vascular obstruction, remodeling, and destruction lead to increased right ventricular afterload and hypertrophy, right heart failure, and death. On a cellular level, the dysregulated proliferation of endothelial, smooth muscle, and immune cells predominates within the diseased vessels.<sup>2</sup> Hemodynamically, pulmonary arterial hypertension can be defined as a mean pulmonary artery pressure greater than 25 mmHg, a pulmonary capillary wedge pressure less than 15 mmHg, and a pulmonary vascular resistance (PVR) greater than 3 Wood units in the absence of a more common cause such as left heart disease, chronic venothromboembolic disease, or lung disease. Like pulmonary hypertension in general, pulmonary arterial hypertension can result from multiple causes, including infectious and autoimmune pathologies. In this review, our focus will be on pulmonary arterial hypertension specifically (World Health Organization Group 1), predominantly comprising idiopathic and heritable pulmonary arterial hypertension, as well as pulmonary arterial hypertension associated with connective tissue disease, congenital heart disease, or other systemic conditions.

Major pulmonary hypertension clinical registries report pulmonary arterial hypertension incidence rates between 1.1 to 7.6 cases of pulmonary arterial hypertension per million adults per year with a prevalence ranging from 11 to 26 cases per million adults.<sup>2</sup> The disease demonstrates a gender bias, occurring four times more frequently in women, but with worse survival in male patients.<sup>3</sup> Although pulmonary arterial hypertension is a relatively rare disease, it has a grim prognosis with mortality 5 yr after diagnosis as high as 60%.<sup>1</sup> However, the preceding decades have seen significant improvement in the survival of patients with pulmonary arterial hypertension,<sup>4</sup> likely attributable to a combination of increased awareness, improved management of right heart failure, and access

to pulmonary arterial hypertension therapies and anticoagulation. As a result, patients with pulmonary arterial hypertension are increasingly presenting for noncardiac surgery.

Pulmonary arterial hypertension remains an indolent, progressive disease without a cure. Current therapies delay clinical worsening and improve quality of life, but generally have not been shown to decrease mortality. Therapeutic approaches include both supportive and disease-specific measures. Supportive measures include salt and fluid restriction, supplemental oxygen to maintain systemic arterial oxygen saturation greater than 90%,<sup>5</sup> exercise training, and consideration of diuretics for venous congestion attributable to right heart failure. In some patients, anticoagulation with warfarin is prescribed to mitigate thrombosis in resistance pulmonary arteries; however, its benefit appears contingent on the underlying type and cause of pulmonary arterial hypertension.<sup>6</sup> The role of new oral anticoagulants remains unknown.

Current pulmonary arterial hypertension therapies work through dilating the pulmonary vasculature, and thereby offset the elevated right ventricular afterload. These temporizing measures may neglect the underlying mechanism of disease pathogenesis, and new approaches are wanting. To that end, pulmonary arterial hypertension has more recently been associated with dysregulated and aberrant inflammation independent of the underlying cause.<sup>7,8</sup> In this narrative review, we delineate the immunologic basis of pulmonary arterial hypertension, highlighting biomedical and clinical evidence, and review ongoing clinical trials targeting the immune system in pulmonary arterial hypertension, as well as potential immunomodulatory therapeutic strategies for future study. Throughout, we emphasize the implications for perioperative and critical care specialists, beginning with a discussion of the perioperative management of patients with pulmonary arterial hypertension.

### Perioperative Management of Patients with Pulmonary Arterial Hypertension

Patients with pulmonary arterial hypertension represent some of the greatest management challenges for

This article is featured in "This Month in Anesthesiology," page 1A. This article has a video abstract.

Submitted for publication October 24, 2018. Accepted for publication March 18, 2019. From the Department of Anesthesia and Pain Medicine, The Hospital for Sick Children, Toronto, Ontario, Canada (N.M.G., B.E.S.); Sick Kids Research Institute, Program in Cell Biology (N.M.G.) and Program in Neuroscience and Mental Health (B.E.S.), Toronto, Ontario, Canada; Department of Pediatrics and Vera Moulton Wall Center for Pulmonary Vascular Disease, Stanford University School of Medicine, Stanford, California (M.R.).

Copyright © 2019, the American Society of Anesthesiologists, Inc. Wolters Kluwer Health, Inc. All Rights Reserved. Anesthesiology 2019; 131:898–907

anesthesiologists and critical care physicians alike.<sup>9</sup> Their perioperative risk has primarily been evaluated through retrospective studies,<sup>10–14</sup> partly limited by differences in methodology and consideration of combined World Health Organization pulmonary hypertension groups. Yet, together they uniformly speak to the considerable risk of morbidity and mortality in patients with pulmonary arterial hypertension across the perioperative period,<sup>10–15</sup> above that seen in other types of pulmonary hypertension.<sup>16</sup> Rates of serious perioperative complications, including respiratory failure, heart failure, cardiovascular instability, and myocardial infarction, approach 40%,<sup>10</sup> and noncardiac surgical mortality occurs in 3.5% to 8% of patients.<sup>10,11,15</sup> Death occurs most commonly within the first 48 h of surgery and typically results from right heart failure.<sup>12,16</sup> The risk of death remains elevated after both minor and major surgeries, with a further increase in the context of emergency procedures.<sup>13,15</sup> No differential risk of complication or death has been demonstrated between anesthetic techniques.<sup>16</sup> Not surprisingly, patients with pulmonary arterial hypertension experience longer intensive care unit and hospital lengths of stay with higher 30-day readmission rates.<sup>11</sup>

Given the high risk of morbidity and mortality in the perioperative period for patients with pulmonary arterial hypertension, delaying elective procedures to undertake a thorough preoperative evaluation by a multidisciplinary team with specific consultation with a pulmonary hypertension specialist is warranted.<sup>9</sup> Pulmonary arterial hypertension is itself an independent predictor of perioperative complications.<sup>17</sup> Patient-risk factors of morbidity and mortality include a right atrial pressure greater than 7 mmHg and a 6-min walk test shorter than 399 m.<sup>15</sup> The preoperative period is thus an opportunity to optimize medical therapy and exercise capacity. Pulmonary vasodilators are generally routinely continued perioperatively.<sup>18,19</sup>

At present, the U.S. Food and Drug Administration has approved 14 pulmonary arterial hypertension–specific therapies that target four major molecular pathways all related to pulmonary vascular tone (fig. 1). Notably, none directly addresses pulmonary vascular remodeling or targets the right ventricle. Approaches to pulmonary arterial hypertension treatment and the pulmonary arterial hypertension–specific therapies have been thoroughly reviewed<sup>2</sup> and are summarized in figure 1. The management of severe pulmonary hypertension in the operative setting has similarly been comprehensively reviewed.<sup>9</sup>

In this review, we deal separately with the chronic management of pulmonary arterial hypertension (the main focus herein) and the rescue of acute, decompensated right-sided heart failure or an acute PVR crisis. In the acute setting, the importance of pulmonary vasodilators and inotropic support cannot be overemphasized: reduction in PVR and support of the right ventricle represent the anesthesiologist's most pressing priorities. Pulmonary vasodilator drugs target one of four major pathways using several routes of administration.

The cellular pathways in question involve L-type calcium channels, endothelin-1, nitric oxide, and prostacyclin.<sup>9,20</sup> Calcium channel blockers, specifically indicated for the subset of patients demonstrating positive vasoactive testing in the cardiac catheterization laboratory, can be used at high doses and should be terminated or supplemented by other drugs if no effect is noted.<sup>6</sup> Of note, significant systemic hypotension may arise as a result of calcium channel blockade in this population. Careful multidisciplinary consultation is advised for potential bridging to other drugs in the perioperative setting.

Endothelin receptor antagonists (bosentan, macitentan, ambrisentan) are among the best-studied drugs for the chronic management of pulmonary arterial hypertension. The landmark Study with an Endothelin Receptor Antagonist in Pulmonary Arterial Hypertension to Improve Clinical Outcome trial demonstrated the efficacy of macitentan in pulmonary arterial hypertension patients for decreasing risk of a primary outcome of clinical worsening, lung transplantation, atrial septostomy, initiation of prostanooids, or death.<sup>21</sup> Importantly, patients taking macitentan may develop both elevated liver enzymes and anemia, so testing liver function and hemoglobin concentration before major surgery would be prudent.<sup>21</sup> Although macitentan has a clinical effect shortly after initiation of therapy, patients should ideally be at a steady-state with respect to their disease before nonemergent surgery.

Nitric oxide is a potent pulmonary vasodilator, endogenously produced in the lung endothelium, acting through the production of cyclic guanosine monophosphate by the enzyme soluble guanylyl cyclase.<sup>22</sup> Patients with pulmonary arterial hypertension often produce less NO, as part of an overall endothelial dysfunction and imbalance of vasoconstrictor *versus* vasodilator substances.<sup>23</sup> Pharmacologically, NO can be targeted in three ways: by delivering inhaled NO acutely,<sup>24</sup> using oral phosphodiesterase-5 inhibitors (sildenafil, tadalafil) to decrease cyclic guanosine monophosphate breakdown,<sup>25</sup> or more recently, using an activator of soluble guanylyl cyclase (riociguat).<sup>26</sup> For acute use, inhaled NO can be attached to an anesthesia circuit for rapid addition, and has a long history of successful use in the acute intraoperative setting.<sup>9</sup> The ongoing INOvation-1 trial is a placebo-controlled, randomized, controlled trial designed to evaluate the long-term safety and efficacy of inhaled NO in pulmonary arterial hypertension (clinicaltrials.gov NCT02725372). The chronic vasodilatory effects of sildenafil and other drugs discussed herein should give pause to anesthesiologists, as they can cause hypotension, have antiplatelet effects, and may also inhibit hypoxic pulmonary vasoconstriction during thoracic surgery and one-lung ventilation.<sup>9,27</sup> Stable patients are unlikely to be successfully transitioned away from these drugs before elective surgery, so continuing them through the perioperative period, with knowledge of their potential adverse effects under anesthesia, is of paramount importance.

Finally, another mainstay drug class in the therapy of pulmonary arterial hypertension are the prostanoids. These

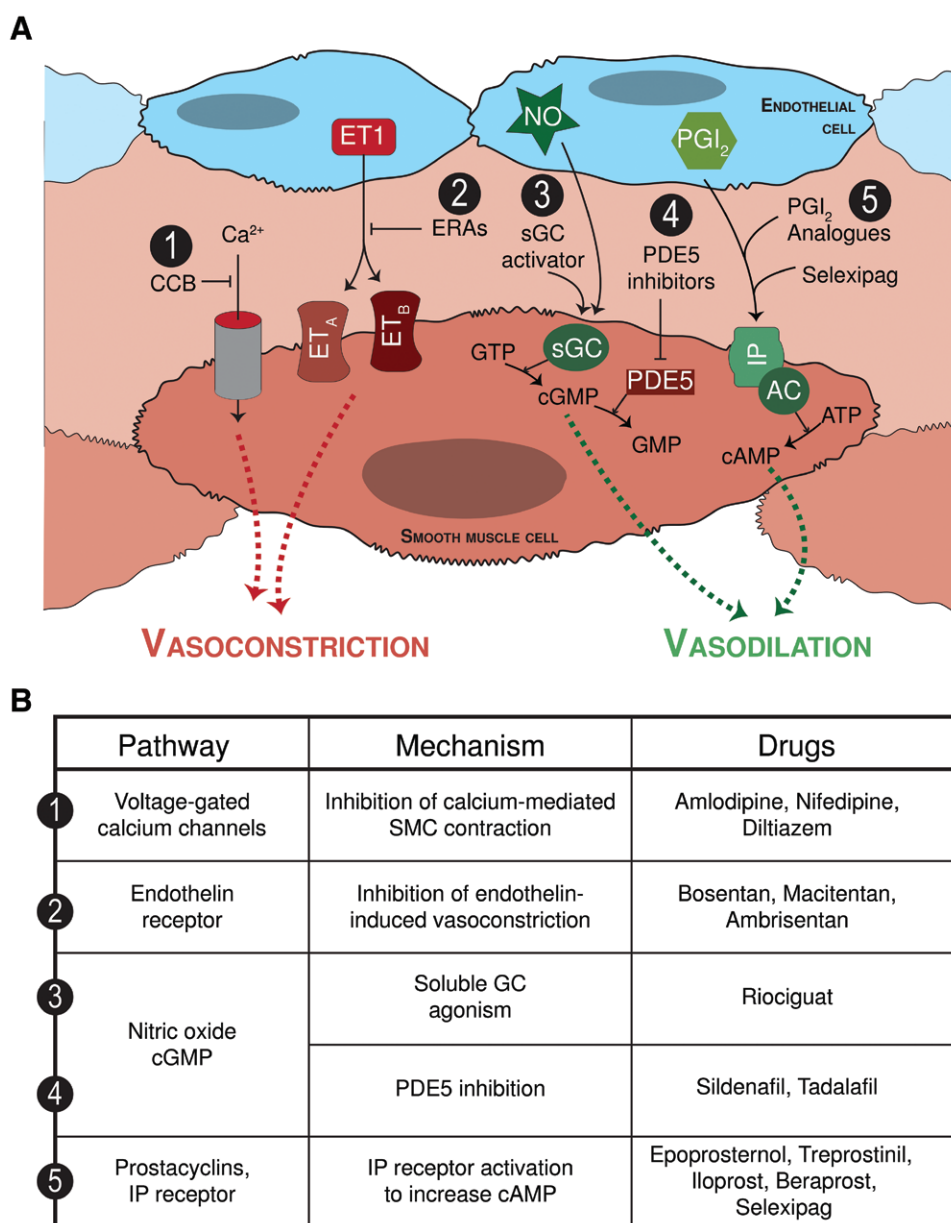

**Fig. 1.** (A) Current pulmonary arterial hypertension (PAH)-specific therapies target four molecular pathways, all of which are directed at vasodilating the pulmonary vasculature. (1) *Calcium channel blockers*: The calcium channel blockers amlodipine, nifedipine, and diltiazem all block calcium entry into vascular smooth muscle cells (SMC), thereby preventing SMC contraction and pulmonary vasoconstriction. Unfortunately, this class of medications is only effective in less than 10% of PAH patients, and long-term responses are often limited. (2) *Endothelin pathway*: Endothelin acts through its endothelin A and B receptors (ET<sub>A</sub> and ET<sub>B</sub>, respectively) to cause vasoconstriction as well as SMC proliferation. Bosentan and macitentan are both dual endothelin receptor antagonists (ERA), whereas ambrisentan is a selective endothelin receptor A antagonist. (3) *Nitric oxide pathway*: Nitric oxide (NO) is a vasodilator that signals through soluble guanylate cyclase (sGC), which generates cyclic guanosine monophosphate (cGMP) and causes pulmonary artery SMC relaxation. The cGMP is subsequently degraded by phosphodiesterases (PDE). Accordingly, the (3) direct sGC stimulator riociguat and the (4) PDE5 inhibitors sildenafil and tadalafil drive the NO pathway to enhance vasodilation. The use of inhaled nitric oxide is currently reserved for the intraoperative and intensive care unit acute management of pulmonary hypertension treatment. (5) *Prostacyclin pathway*: Prostacyclin and prostanoids bind the IP receptor to stimulate cyclic adenosine monophosphate, which in turn causes pulmonary vasodilation. Various preparations of prostanoids are available and can be administered *via* different routes, including continuous infusion intravenously or subcutaneously, by inhalation, and orally. The prostanoids include epoprostenol, treprostinil, iloprost, and beraprost. Selexipag, in contrast, is the first nonprostanoid IP receptor activator. (B) Currently approved PAH-specific medications with their respective pathway target and mechanism of action. ATP, adenosine triphosphate; cAMP, cyclic adenosine monophosphate; CCB, calcium channel blocker; GTP, guanosine monophosphate; IP, Prostacyclin receptor; PGI, Prostaglandin I.

drugs can be inhaled for acute use, delivered by continuous intravenous infusion, or given orally in a new formulation.<sup>6</sup> The inhaled formulations demonstrate a high degree of specificity for the pulmonary vasculature, and can synergize with inhaled or intravenous milrinone as well.<sup>28</sup> These drugs are direct vasodilators of the pulmonary circulation, while also providing some antiplatelet and anti-inflammatory benefit.<sup>23</sup> In the commonest form for chronic use, intravenous epoprostenol is delivered centrally *via* continuous infusion. In the operating room, such a system requires the utmost vigilance, as access to the line, as well as its patency, must be maintained or a critical PVR crisis may arise upon discontinuation.<sup>6</sup> Furthermore, meticulous sterile technique must be maintained, because line infection and loss of central access is a devastating complication for this group.<sup>29</sup>

In summary, great care and planning must go into the surgical care of pulmonary arterial hypertension patients. Multidisciplinary involvement is critical, and major surgery should be carried out in centers with appropriate postoperative intensive care available. The specific interactions of pulmonary arterial hypertension therapies with anesthesia and surgical insults (including systemic hypotension, antiplatelet effects, interaction with other vasodilators, the need for special access and delivery equipment, and other considerations) necessitate holistic planning on the part of the perioperative team for the safe management of a high-risk population.<sup>29</sup>

### Immunologic Basis of Pulmonary Arterial Hypertension

A large body of evidence from both human trials and pre-clinical models currently supports the fundamental immunologic underpinnings of pulmonary arterial hypertension, implicating both soluble and cellular immune mediators across the innate and adaptive immune systems.<sup>30</sup>

Cytokines such as tumor necrosis factor and interleukins 1 $\beta$  and -6 are all found in increased concentrations in the blood of pulmonary arterial hypertension patients as compared to controls,<sup>8,31,32</sup> and in some cases, these levels correlate with disease severity. For instance, circulating interleukin-6 serves as a high-fidelity marker of right ventricular dysfunction in pulmonary arterial hypertension<sup>33</sup> and is elevated in almost all human and animal studies of the disease. Other noncanonical immune mediators have similarly been implicated. In particular, the proinflammatory protein high mobility group box-1 is elevated in the lungs and plasma of patients with idiopathic and congenital heart disease-related pulmonary arterial hypertension.<sup>34,35</sup> High mobility group box-1 is notable in that it is able to activate both innate and adaptive immunity pathways.<sup>36</sup> As such, it represents an active area of research in pulmonary arterial hypertension pathogenesis, and its modulation may form the basis for novel therapeutics. To that end, encouraging preclinical work in rodent models of PH has demonstrated that high mobility group box-1 neutralization protects against disease development.<sup>37</sup>

Immune cells are also important drivers of pulmonary arterial hypertension. A broad histopathologic survey of lungs from patients with pulmonary arterial hypertension demonstrated significant perivascular and interstitial inflammation with immune cell infiltration, regardless of the cause of pulmonary arterial hypertension.<sup>38</sup> The immune cell types that circulate and infiltrate the lungs of patients with pulmonary arterial hypertension include B and T lymphocytes,<sup>39–43</sup> macrophages,<sup>43</sup> neutrophils,<sup>44–46</sup> dendritic cells,<sup>7,43</sup> and mast cells.<sup>7,43</sup> Interestingly, patients with pulmonary arterial hypertension have a different immune cellular landscape in their lungs as compared with those of control patients, which suggests a shift toward the adaptive immune system. Recruited immune cells not only represent a potential source of local and circulating cytokines, but also directly contribute to pulmonary vascular remodeling. The abnormal pulmonary adventitia and vessels can also secrete proinflammatory molecules that activate immune cells,<sup>47</sup> further amplifying this process. Taken together, positive feedback loops propagate inflammation within the vessel wall and perpetuate the vasculopathy of pulmonary arterial hypertension.

The immunologic basis of pulmonary arterial hypertension development continues to evolve as the disease itself progresses. Later in the course of the disease, the adaptive immune system grows in influence and a more complex network of immune reactions develops within the vessel wall. The importance of adaptive immunity in pulmonary arterial hypertension has been further highlighted in several recent preclinical studies.<sup>48,49</sup> Yet, the importance of adaptive immunity in clinical disease is not a new concept. More than two decades ago, idiopathic pulmonary arterial hypertension was speculated to represent an autoimmune disease.<sup>50</sup> This notion has since gained increasing traction. The lungs of patients with pulmonary arterial hypertension contain bronchus-associated lymphoid tissue<sup>51</sup> and tertiary lymphoid tissue<sup>52</sup> capable of producing autoantibodies in a self-sustained fashion. Although the importance of autoimmunity in pulmonary arterial hypertension may have been anticipated in connective tissue disease and other rheumatologic illnesses, it is unexpected to find self-reactive antibodies in patients with pulmonary arterial hypertension resulting from non-immunologic disease states. Yet, as many as 60% of patients with idiopathic pulmonary arterial hypertension had circulating autoantibodies,<sup>50</sup> as do even a proportion of patients with congenital heart disease-related pulmonary arterial hypertension.<sup>53</sup> The antivascular autoantibodies that are produced in this tissue will be made in a self-sustained fashion in a germinal center.<sup>52</sup> Therefore, tissue destruction and inflammation can continue in the absence of the initial immune stimulus. This, along with epigenetic changes in parenchymal cells,<sup>54</sup> may well form the basis for the chronic, progressive nature of pulmonary arterial hypertension.



## Pulmonary Arterial Hypertension Clinical Trials Targeting the Immune System

Given the lack of meaningful long-term improvement seen with vasodilator therapy, clinicians and scientists are attempting to test new management paradigms clinically. To that end, the predominance of clinical and preclinical evidence pointing to the importance of the immune system in pulmonary arterial hypertension has spawned a host of clinical trials. The guiding principles for such trials are outlined above with both cellular and soluble immune targets now informing clinical inquiry.

To investigate the current clinical interest in immunotherapy for pulmonary arterial hypertension, we conducted a search of active clinical trials in pulmonary arterial hypertension using the United States National Library of Medicine's clinical trials registry (fig. 2; see legend for search details). From January 1, 2015, to the present, 70 active trials met our inclusion criteria from a total of 170. Of the included trials, the largest group continues to investigate the use of vasodilator therapy (54%), which is in line with the current role of these drugs in standard of care. Notably, therapies targeting metabolism and nutrition (21%) represented the next largest group, followed closely by immunotherapies (20%). Of course, many of the tested therapies cross between these overall categories: metabolic treatments may have antiinflammatory roles, as do several traditional vasodilators. However, entirely immunologic therapeutics, such as inhibition of neutrophil elastase by elafin, the use of stem and progenitor cells, interleukin-1 $\beta$  antagonism with anakinra, and nuclear factor kappa-light-chain-enhancer of activated B cells inhibition by bardoxolone, are the subject of large-scale human trials.

One patient group of particular interest is systemic sclerosis-associated pulmonary arterial hypertension, which is one of the deadliest forms of the disease.<sup>1</sup> Etiologically, systemic sclerosis-associated pulmonary arterial hypertension has a strong autoimmune component, driven in part by B lymphocytes. As such, a prospective, double-blind, placebo-controlled trial is currently underway testing B cell depletion with the anti-CD20 monoclonal antibody, rituximab (NCT01086540), in patients with systemic sclerosis-associated pulmonary arterial hypertension.

Soluble mediators are also being targeted. In the recently reported Canakinumab Antiinflammatory Thrombosis Outcome Study trial<sup>55</sup> of 10,061 patients with previous myocardial infarction and elevated C-reactive protein and on optimal medical therapy, interleukin-1 $\beta$  inhibition with the monoclonal antibody canakinumab reduced the incidence of repetitive atherothrombotic events, albeit with a small effect size. This study provides evidence that an anti-inflammatory therapy can modify an inflammatory vascular disease in humans. Moreover, in a case report, interleukin-1 $\beta$  antagonism with the interleukin-1 receptor inhibitor, anakinra, was found to reverse pulmonary arterial hypertension in a single patient with Still's disease.<sup>56</sup> A clinical trial of

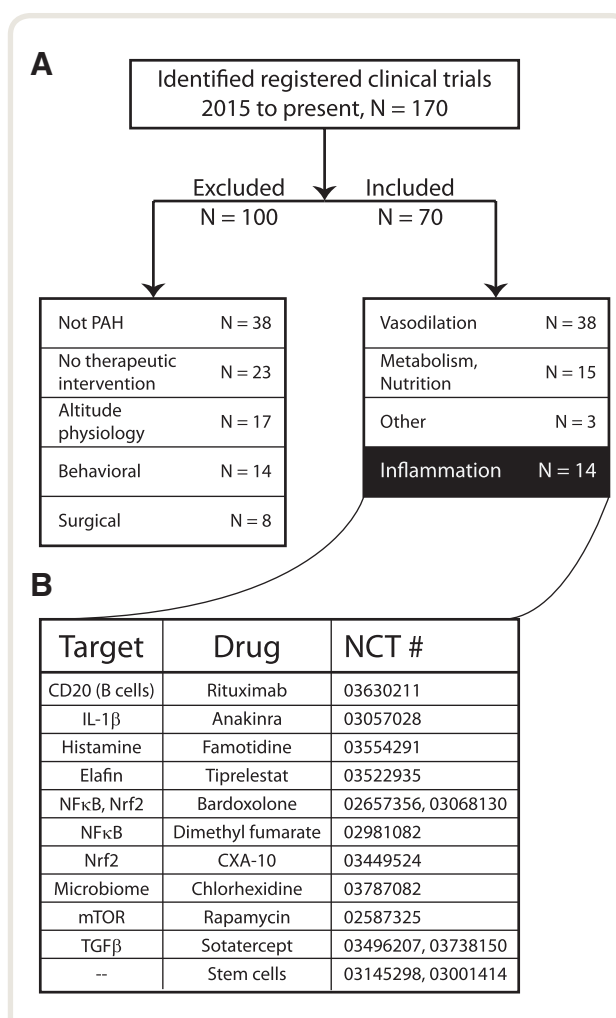

**Fig. 2.** The immune system is being investigated as a potential therapeutic target in pulmonary arterial hypertension (PAH). (A) Current clinical trials investigating PAH therapies. A search was performed on ClinicalTrials.gov for “pulmonary hypertension” from January 1, 2015, to the January 1, 2019. Limits were set to “interventional study,” and adult patients only. Trial status classifications included were not yet recruiting, recruiting, enrolling by invitation, active not recruiting, and unknown status. A total of 170 studies were identified, and inclusion and exclusion categories are depicted in the flow chart. Of the 70 interventional trials included, half (54%) are investigating vasodilator therapy, 20% focus on immunological targets, and 21% are targeting metabolism and nutrition. (B) Specific examples of immune targets and therapies currently under clinical study in PAH. NCT refers to the registered Clinical Trial number, with study information available at ClinicalTrials.gov.

anakinra is currently underway to assess exercise tolerance and safety in adults with pulmonary arterial hypertension (NCT03057028). These data will provide important insights into the potential feasibility of immunomodulation as a treatment paradigm in pulmonary arterial hypertension.

Similarly, there are case reports of pulmonary arterial hypertension improvement in patients with pulmonary

hypertension secondary to inflammatory conditions treated with the interleukin-6 receptor antagonist tocilizumab.<sup>57</sup> A small Phase 2 trial of tocilizumab in pulmonary arterial hypertension has since been completed (NCT02676947).<sup>58</sup> Although the full data have not yet been reported, the drug was administered to 23 patients with a good safety profile. A larger, therapeutic study is expected.

Many of the inflammatory and immune pathways discussed in this review are under the control of the transcription factor nuclear factor  $\kappa$ B. Nuclear factor  $\kappa$ B activation results in the upregulation of genes encoding interleukin-6, interleukin-1 $\beta$ , tumor necrosis factor, and other important immunologic signals.<sup>59</sup> These pathways promote the recruitment and activation of immune cells in target tissues, including the lung. Multiple lines of evidence from rodent models have shown that nuclear factor  $\kappa$ B blockade can prevent the development of pulmonary hypertension.<sup>60</sup> Furthermore, patients with idiopathic pulmonary arterial hypertension have activated nuclear factor  $\kappa$ B in their lung tissue,<sup>61</sup> indicating a potential role for this pathway in human disease. It is therefore no surprise that neutralization of nuclear factor  $\kappa$ B signaling is an active field of clinical investigation in pulmonary arterial hypertension. A trial is currently assessing the drug bardoxolone for the treatment of connective tissue disease–associated pulmonary arterial hypertension (NCT02657356). Bardoxolone blocks nuclear factor  $\kappa$ B by stimulating the regulatory transcription factor nuclear factor (erythroid-derived 2)–like 2.<sup>62</sup> This trial will assess the effect of bardoxolone on 6-minute walk test distance in patients with connective tissue disease–associated pulmonary arterial hypertension. Another trial is currently completing a long-term follow-up in connective tissue disease–associated pulmonary arterial hypertension patients who received bardoxolone previously (NCT03068130). These studies will assess the safety profile of nuclear factor  $\kappa$ B manipulation in pulmonary arterial hypertension and will likely stimulate further trials looking at transcription regulators in inflammation.

A final area of current clinical therapeutic inquiry involving inflammation and pulmonary arterial hypertension centers on the inhibition of neutrophil elastase. Elastase, which can also be secreted by pulmonary vascular smooth muscle cells, plays a fundamental role in the adverse remodeling of the lung vasculature in pulmonary arterial hypertension. Although the clinical use of elastase inhibitors has been limited by hepatotoxicity, the endogenous elastase inhibitor, elafin, remains a promising therapeutic possibility. Elafin, in addition to blocking the action of elastase, enhances bone morphogenic protein receptor–mediated signaling, inhibits nuclear factor  $\kappa$ B, and dampens the innate immune system.<sup>63</sup> Administration of elafin in animal models reverses pulmonary arterial hypertension.<sup>64</sup> As such, clinical exploration of elafin as a pulmonary arterial hypertension therapy is underway, beginning with a safety and tolerance trial in healthy volunteers (NCT03522935). The position of elafin at the

crossroads of so many disease-relevant pathways makes this line of investigation particularly exciting.

## Inflammation in Pulmonary Arterial Hypertension: Implications for the Anesthesiologist

Our evolving understanding of the pathobiology of pulmonary arterial hypertension and the development of new treatment paradigms will have implications for anesthesiologists and critical care physicians. Hopefully such treatments will result in improved preoperative optimization of these high-risk patients. However, as with any new therapies, their interactions with anesthetic drugs and the operative environment will have to be studied and accounted for. It stands to reason that some of these experimental agents will result in some degree of immunosuppression, which will necessitate vigilance and aggressive treatment of infection and sepsis. The overall inflammatory milieu in this population may predispose them to further insults. For instance, pulmonary arterial hypertension may serve as a first hit, increasing susceptibility to ventilator-induced lung injury and acute respiratory distress syndrome. In fact, several of the biomarkers and inflammatory mediators seen in pulmonary arterial hypertension are also found in acute respiratory distress syndrome and correlate with poor outcome.<sup>65</sup>

There is a broad base of evidence showing that the perioperative period is a time of immune dysregulation and inflammation, and that anesthesia can have a meaningful impact on this state.<sup>66</sup> One could speculate that anesthetic techniques that serve to minimize these insults—including regional anesthesia, and pre-emptive analgesia—may benefit patients with pulmonary arterial hypertension coming for surgery. As new treatments emerge for pulmonary arterial hypertension patients, and our understanding of disease pathogenesis deepens, this will represent an important field of study for perioperative and critical care physicians. Until such agents are approved for use, it is unlikely that specific perioperative data will be available to guide anesthetic care. For a discussion of the interactions of pulmonary vasodilators with the operative setting, please see the Perioperative Management of Patients with Pulmonary Arterial Hypertension section above, and other publications.<sup>9</sup> As an example of the potential for immunotherapy for pulmonary arterial hypertension in the critical care setting, an instructional case series using tacrolimus has been published.<sup>67</sup> Having identified tacrolimus as an agent that modulates pathways important in pulmonary arterial hypertension,<sup>68</sup> a series of three patients with end-stage, treatment-refractory pulmonary arterial hypertension were given low-dose tacrolimus. One patient was subsequently delisted from the lung transplant registry because of her improvement to low-risk status within 2 months of treatment initiation. A second patient had substantial recovery of RV function within 3 months, with concomitant improvements in her functional status. A third patient improved, voluntarily discontinued tacrolimus and worsened, only to again improve following reinstitution

of therapy.<sup>67</sup> A randomized trial of tacrolimus for pulmonary arterial hypertension is currently underway to systematically assess its utility in pulmonary arterial hypertension (NCT01647945), but this small series of patients may offer a glimpse into the future of pulmonary arterial hypertension management in the clinic and the intensive care unit. The fact that palliative disease was improved suggests that this strategy may become useful in the acute setting.

## Future Immune Targets and Therapeutic Strategies in Pulmonary Arterial Hypertension

Although much debate continues on the topic of the primary insult that leads to pulmonary arterial hypertension, it is clear that the disease is characterized by smoldering inflammation.<sup>69</sup> This inflammation involves the totality of the immune system, affecting almost all known cell types and branches of immunity. It follows that therapeutic immune targeting necessitates restricted modulation of specific immunologic responses to mitigate off-target effects and global immunosuppression. For example, preclinical work is investigating the use of biased agonists and antagonists that preferentially propagate or inhibit signaling down one of several downstream pathways, respectively.<sup>70</sup>

Our better understanding of pulmonary arterial hypertension as an immunologic disease will certainly usher in a new era of targeted therapies for this fatal condition and shift management away from vasodilation toward immunomodulation. This would parallel the history of asthma, another inflammatory lung disease. Before the 1900s, the mainstays of therapy were bronchodilators, ironically in the form of “anticholinergic cigarettes.”<sup>71</sup> These treatments were relatively effective for acute exacerbations, but failed to address the root cause in the way that modern controller inhalers do. With the advent of newer drugs, but more importantly, with an understanding of the inflammatory nature of the disease, asthma management shifted toward immunotherapy, with steroids coming to the fore in the 1950s.<sup>71</sup> We see pulmonary arterial hypertension following a similar trajectory, with vasodilators maintaining a role, but immunomodulators taking over as mainstay therapy. Like asthma, pulmonary arterial hypertension is a clinical syndrome, encompassing a host of causative factors. As such, it is likely that a variety of treatments will be required to address the various causes of pulmonary arterial hypertension. New clinical trials should shed light on the feasibility of such treatments in the coming years, and active translational research will continue to feed this pipeline. New targeted therapies will hopefully begin to have substantive impacts upon patients experiencing this terrible disease.

## Research Support

Support was provided from institutional and/or departmental sources, along with a grant from the International Anesthesia Research Society (San Francisco, California; to Dr. Goldenberg).

## Competing Interests

The authors declare no competing interests.

## Correspondence

Address correspondence to Dr. Steinberg: Department of Anesthesia and Pain Medicine, Hospital for Sick Children, 555 University Avenue, Toronto, Ontario, Canada M5G 1X8. benjamin.steinberg@sickkids.ca. Information on purchasing reprints may be found at [www.anesthesiology.org](http://www.anesthesiology.org) or on the masthead page at the beginning of this issue. ANESTHESIOLOGY's articles are made freely accessible to all readers, for personal use only, 6 months from the cover date of the issue.

## References

1. Simonneau G, Gatzoulis MA, Adatia I, Celermajer D, Denton C, Ghofrani A, Gomez Sanchez MA, Krishna Kumar R, Landzberg M, Machado RF, Olschewski H, Robbins IM, Souza R: Updated clinical classification of pulmonary hypertension. *J Am Coll Cardiol* 2013; 62(25 Suppl):D34–41
2. Thenappan T, Ormiston ML, Ryan JJ, Archer SL: Pulmonary arterial hypertension: Pathogenesis and clinical management. *BMJ* 2018; 360:j5492
3. Jacobs W, van de Veerdonk MC, Trip P, de Man F, Heymans MW, Marcus JT, Kawut SM, Bogaard HJ, Boonstra A, Vonk Noordegraaf A: The right ventricle explains sex differences in survival in idiopathic pulmonary arterial hypertension. *Chest* 2014; 145:1230–6
4. Badesch DB, Raskob GE, Elliott CG, Krichman AM, Farber HW, Frost AE, Barst RJ, Benza RL, Liou TG, Turner M, Giles S, Feldkircher K, Miller DP, McGoon MD: Pulmonary arterial hypertension: Baseline characteristics from the REVEAL Registry. *Chest* 2010; 137:376–87
5. Ulrich S, Hasler ED, Saxer S, Furian M, Müller-Mottet S, Keusch S, Bloch KE: Effect of breathing oxygen-enriched air on exercise performance in patients with precapillary pulmonary hypertension: Randomized, sham-controlled cross-over trial. *Eur Heart J* 2017; 38:1159–68
6. Galiè N, Humbert M, Vachiery J-L, Gibbs S, Lang I, Torbicki A, Simonneau G, Peacock A, Vonk Noordegraaf A, Beghetti M, Ghofrani A, Gomez Sanchez MA, Hansmann G, Klepetko W, Lancellotti P, Matucci M, McDonagh T, Pierard LA, Trindade PT, Zompatori M, Hoeper M, ESC Scientific Document Group: 2015 ESC/ERS Guidelines for the diagnosis and treatment of pulmonary hypertension: The Joint Task Force for the Diagnosis and Treatment of Pulmonary Hypertension of the European Society of Cardiology (ESC) and the European Respiratory Society (ERS): Endor. *Eur Heart J* 2016; 37:67–119

7. Marsh LM, Jandl K, Grünig G, Foris V, Bashir M, Ghanim B, Klepetko W, Olschewski H, Olschewski A, Kwapiszewska G: The inflammatory cell landscape in the lungs of patients with idiopathic pulmonary arterial hypertension. *Eur Respir J* 2018; 51
8. Rabinovitch M, Guignabert C, Humbert M, Nicolls MR: Inflammation and immunity in the pathogenesis of pulmonary arterial hypertension. *Circ Res* 2014; 115:165–75
9. Couture EJ, Provencher S, Denault AY: Management of severe pulmonary hypertensive disease for surgical and nonsurgical procedures. *Int Anesthesiol Clin* 2018; 56:e28–55
10. Price LC, Montani D, Jaïs X, Dick JR, Simonneau G, Sitbon O, Mercier FJ, Humbert M: Noncardiothoracic nonobstetric surgery in mild-to-moderate pulmonary hypertension. *Eur Respir J* 2010; 35:1294–302
11. Kaw R, Pasupuleti V, Deshpande A, Hamieh T, Walker E, Minai OA: Pulmonary hypertension: An important predictor of outcomes in patients undergoing non-cardiac surgery. *Respir Med* 2011; 105:619–24
12. Ramakrishna G, Sprung J, Ravi BS, Chandrasekaran K, McGoon MD: Impact of pulmonary hypertension on the outcomes of noncardiac surgery: Predictors of perioperative morbidity and mortality. *J Am Coll Cardiol* 2005; 45:1691–9
13. Lai HC, Lai HC, Wang KY, Lee WL, Ting CT, Liu TJ: Severe pulmonary hypertension complicates postoperative outcome of non-cardiac surgery. *Br J Anaesth* 2007; 99:184–90
14. Memtsoudis SG, Ma Y, Chiu YL, Walz JM, Voswinckel R, Mazumdar M: Perioperative mortality in patients with pulmonary hypertension undergoing major joint replacement. *Anesth Analg* 2010; 111:1110–6
15. Meyer S, McLaughlin VV, Seyfarth HJ, Bull TM, Vizza CD, Gombert-Maitland M, Preston IR, Barberà JA, Hassoun PM, Halank M, Jaïs X, Nickel N, Hoeper MM, Humbert M: Outcomes of noncardiac, nonobstetric surgery in patients with PAH: An international prospective survey. *Eur Respir J* 2013; 41:1302–7
16. Stepan J, Diaz-Rodriguez N, Barodka VM, Nyhan D, Pullins E, Houston T, Damico RL, Mathai SC, Hassoun PM, Berkowitz DE, Maxwell BG, Kolb TM: Focused review of perioperative care of patients with pulmonary hypertension and proposal of a perioperative pathway. *Cureus* 2018; 10:e2072
17. Price LC, Wort SJ, Finney SJ, Marino PS, Brett SJ: Pulmonary vascular and right ventricular dysfunction in adult critical care: Current and emerging options for management: A systematic literature review. *Crit Care* 2010; 14:R169
18. Fox DL, Stream AR, Bull T: Perioperative management of the patient with pulmonary hypertension. *Semin Cardiothorac Vasc Anesth* 2014; 18:310–8
19. Fleisher LA, Fleischmann KE, Auerbach AD, Barnason SA, Beckman JA, Bozkurt B, Davila-Roman VG, Gerhard-Herman MD, Holly TA, Kane GC, Marine JE, Nelson MT, Spencer CC, Thompson A, Ting HH, Uretsky BF, Wijeyesundera DN; American College of Cardiology; American Heart Association: 2014 ACC/AHA guideline on perioperative cardiovascular evaluation and management of patients undergoing non-cardiac surgery: A report of the American College of Cardiology/American Heart Association Task Force on practice guidelines. *J Am Coll Cardiol* 2014; 64:e77–137
20. Fox CJ, Cornett EM, Hart BM, Kaye AJ, Patil SS, Turpin MC, Valdez A, Urman RD, Kaye AD: Pulmonary vasodilators: Latest evidence and outcomes in the perioperative setting. *Best Pract Res Clin Anaesthesiol* 2018; 32:237–50
21. Pulido T, Adzerikho I, Channick RN, Delcroix M, Galiè N, Ghofrani HA, Jansa P, Jing ZC, Le Brun FO, Mehta S, Mittelholzer CM, Perchenet L, Sastry BK, Sitbon O, Souza R, Torbicki A, Zeng X, Rubin LJ, Simonneau G; SERAPHIN Investigators: Macitentan and morbidity and mortality in pulmonary arterial hypertension. *N Engl J Med* 2013; 369:809–18
22. Félétou M, Köhler R, Vanhoutte PM: Nitric oxide: Orchestrator of endothelium-dependent responses. *Ann Med* 2012; 44:694–716
23. Goldenberg NM, Kuebler WM: Endothelial cell regulation of pulmonary vascular tone, inflammation, and coagulation. *Compr Physiol* 2015; 5:531–59
24. Ng J, Finney SJ, Shulman R, Bellingan GJ, Singer M, Glynn PA: Treatment of pulmonary hypertension in the general adult intensive care unit: A role for oral sildenafil? *Br J Anaesth* 2005; 94:774–7
25. Galiè N, Ghofrani HA, Torbicki A, Barst RJ, Rubin LJ, Badesch D, Fleming T, Parpia T, Burgess G, Branzi A, Grimminger F, Kurzyna M, Simonneau G; Sildenafil Use in Pulmonary Arterial Hypertension (SUPER) Study Group: Sildenafil citrate therapy for pulmonary arterial hypertension. *N Engl J Med* 2005; 353:2148–57
26. Ghofrani HA, D'Armini AM, Grimminger F, Hoeper MM, Jansa P, Kim NH, Mayer E, Simonneau G, Wilkins MR, Fritsch A, Neuser D, Weimann G, Wang C; CHEST-1 Study Group: Riociguat for the treatment of chronic thromboembolic pulmonary hypertension. *N Engl J Med* 2013; 369:319–29
27. Ross AF, Ueda K: Pulmonary hypertension in thoracic surgical patients. *Curr Opin Anaesthesiol* 2010; 23:25–33
28. Laflamme M, Perrault LP, Carrier M, Elmi-Sarabi M, Fortier A, Denault AY: Preliminary experience with combined inhaled milrinone and prostacyclin in cardiac surgical patients with pulmonary hypertension. *J Cardiothorac Vasc Anesth* 2015; 29:38–45
29. Pritts CD, Pearl RG: Anesthesia for patients with pulmonary hypertension. *Curr Opin Anaesthesiol* 2010; 23:411–6



30. Goldenberg NM, Steinberg BE: Inflammation drives pulmonary arterial hypertension. *ANESTHESIOLOGY* 2019; 130:820–1
31. Selimovic N, Bergh CH, Andersson B, Sakiniene E, Carlsten H, Rundqvist B: Growth factors and interleukin-6 across the lung circulation in pulmonary hypertension. *Eur Respir J* 2009; 34:662–8
32. Soon E, Holmes AM, Treacy CM, Doughty NJ, Southgate L, Machado RD, Trembath RC, Jennings S, Barker L, Nicklin P, Walker C, Budd DC, Pepke-Zaba J, Morrell NW: Elevated levels of inflammatory cytokines predict survival in idiopathic and familial pulmonary arterial hypertension. *Circulation* 2010; 122:920–7
33. Prins KW, Archer SL, Pritzker M, Rose L, Weir EK, Sharma A, Thenappan T: Interleukin-6 is independently associated with right ventricular function in pulmonary arterial hypertension. *J Heart Lung Transplant* 2018; 37:376–84
34. Bauer EM, Shapiro R, Zheng H, Ahmad F, Ishizawa D, Comhair SA, Erzurum SC, Billiar TR, Bauer PM: High mobility group box 1 contributes to the pathogenesis of experimental pulmonary hypertension via activation of Toll-like receptor 4. *Mol Med* 2013; 18:1509–18
35. Huang YY, Su W, Zhu ZW, Tang L, Hu XQ, Zhou SH, Fang ZF, Li J: Elevated serum HMGB1 in pulmonary arterial hypertension secondary to congenital heart disease. *Vascul Pharmacol* 2016; 85:66–72
36. Andersson U, Tracey KJ: HMGB1 is a therapeutic target for sterile inflammation and infection. *Annu Rev Immunol* 2011; 29:139–62
37. Sadamura-Takenaka Y, Ito T, Noma S, Oyama Y, Yamada S, Kawahara K, Inoue H, Maruyama I: HMGB1 promotes the development of pulmonary arterial hypertension in rats. *PLoS One* 2014; 9:e102482
38. Stacher E, Graham BB, Hunt JM, Gandjeva A, Groshong SD, McLaughlin VV, Jessup M, Grizzle WE, Aldred MA, Cool CD, Tudor RM: Modern age pathology of pulmonary arterial hypertension. *Am J Respir Crit Care Med* 2012; 186:261–72
39. Blum LK, Cao RRL, Sweatt AJ, Bill M, Lahey LJ, Hsi AC, Lee CS, Kongpachith S, Ju CH, Mao R, Wong HH, Nicolls MR, Zamanian RT, Robinson WH: Circulating plasmablasts are elevated and produce pathogenic anti-endothelial cell autoantibodies in idiopathic pulmonary arterial hypertension. *Eur J Immunol* 2018; 48:874–84
40. Bourcy CFA de, Dekker CL, Davis MM, Nicolls MR, Quake SR: Dynamics of the human antibody repertoire after B cell depletion in systemic sclerosis. *Sci Immunol* 2017; 2
41. Huertas A, Phan C, Bordenave J, Tu L, Thuillet R, Le Hiress M, Avouac J, Tamura Y, Allanore Y, Jovan R, Sitbon O, Guignabert C, Humbert M: Regulatory T cell dysfunction in idiopathic, heritable and connective tissue-associated pulmonary arterial hypertension. *Chest* 2016; 149:1482–93
42. Hautefort A, Girerd B, Montani D, Cohen-Kaminsky S, Price L, Lambrecht BN, Humbert M, Perros F: T-helper 17 cell polarization in pulmonary arterial hypertension. *Chest* 2015; 147:1610–20
43. Savai R, Pullamsetti SS, Kolbe J, Bieniek E, Voswinckel R, Fink L, Scheed A, Ritter C, Dahal BK, Vater A, Klusmann S, Ghofrani HA, Weissmann N, Klepetko W, Banat GA, Seeger W, Grimminger F, Schermuly RT: Immune and inflammatory cell involvement in the pathology of idiopathic pulmonary arterial hypertension. *Am J Respir Crit Care Med* 2012; 186:897–908
44. Klink A, Berghausen E, Friedrichs K, Molz S, Lau D, Remane L, Berlin M, Kaltwasser C, Adam M, Mehrkens D, Mollenhauer M, Manchanda K, Ravekes T, Heresi GA, Aytekin M, Dweik RA, Hennigs JK, Kubala L, Michaëlsson E, Rosenkranz S, Rudolph TK, Hazen SL, Klose H, Schermuly RT, Rudolph V, Baldus S: Myeloperoxidase aggravates pulmonary arterial hypertension by activation of vascular Rho-kinase. *JCI insight* 2018; 3
45. Harbaum L, Baaske KM, Simon M, Oqueka T, Sinning C, Glatzel A, Lüneburg N, Sydow K, Bokemeyer C, Klose H: Exploratory analysis of the neutrophil to lymphocyte ratio in patients with pulmonary arterial hypertension. *BMC Pulm Med* 2017; 17:72
46. Taylor S, Dirir O, Zamanian RT, Rabinovitch M, Thompson AAR: The role of neutrophils and neutrophil elastase in pulmonary arterial hypertension. *Front Med (Lausanne)* 2018; 5:217
47. Kasmi KC El, Pugliese SC, Riddle SR, Poth JM, Anderson AL, Frid MG, Li M, Pullamsetti SS, Savai R, Nagel MA, Fini MA, Graham BB, Tudor RM, Friedman JE, Eltzschig HK, Sokol RJ, Stenmark KR: Adventitial fibroblasts induce a distinct proinflammatory/profibrotic macrophage phenotype in pulmonary hypertension. *J Immunol* 2014; 193:597–609
48. Tamosiuniene R, Tian W, Dhillon G, Wang L, Sung YK, Gera L, Patterson AJ, Agrawal R, Rabinovitch M, Ambler K, Long CS, Voelkel NF, Nicolls MR: Regulatory T cells limit vascular endothelial injury and prevent pulmonary hypertension. *Circ Res* 2011; 109:867–79
49. Tamosiuniene R, Manouvakova O, Mesange P, Saito T, Qian J, Sanyal M, Lin YC, Nguyen LP, Luria A, Tu AB, Sante JM, Rabinovitch M, Fitzgerald DJ, Graham BB, Habtezion A, Voelkel NF, Aurelian L, Nicolls MR: Dominant role for regulatory T cells in protecting females against pulmonary hypertension. *Circ Res* 2018; 122:1689–702
50. Yanai-Landau H, Amital H, Bar-Dayana Y, Levy Y, Gur H, Lin HC, Alosachie IJ, Peter JB, Shoenfeld Y: Autoimmune aspects of primary pulmonary hypertension. *Pathobiology* 1995; 63:71–5
51. Colvin KL, Cripe PJ, Ivy DD, Stenmark KR, Yeager ME: Bronchus-associated lymphoid tissue in pulmonary

- hypertension produces pathologic autoantibodies. *Am J Respir Crit Care Med* 2013; 188:1126–36
52. Perros F, Dorfmüller P, Montani D, Hammad H, Waelput W, Girerd B, Raymond N, Mercier O, Mussot S, Cohen-Kaminsky S, Humbert M, Lambrecht BN: Pulmonary lymphoid neogenesis in idiopathic pulmonary arterial hypertension. *Am J Respir Crit Care Med* 2012; 185:311–21
  53. Becker MO, Kill A, Kutsche M, Guenther J, Rose A, Tabeling C, Witzernath M, Kühl AA, Heidecke H, Ghofrani HA, Tiede H, Schermuly RT, Nickel N, Hoepfer MM, Lukitsch I, Gollasch M, Kuebler WM, Bock S, Burmester GR, Dragun D, Riemekasten G: Vascular receptor autoantibodies in pulmonary arterial hypertension associated with systemic sclerosis. *Am J Respir Crit Care Med* 2014; 190:808–17
  54. Hu C-J, Zhang H, Laux A, Pullamsetti SS, Stenmark KR: Mechanisms contributing to persistently activated cell phenotypes in pulmonary hypertension. *J Physiol* 2018; 521:366
  55. Ridker PM, Everett BM, Thuren T, MacFadyen JG, Chang WH, Ballantyne C, Fonseca F, Nicolau J, Koenig W, Anker SD, Kastelein JJP, Cornel JH, Pais P, Pella D, Genest J, Cifkova R, Lorenzatti A, Forster T, Kobalava Z, Vida-Simiti L, Flather M, Shimokawa H, Ogawa H, Dellborg M, Rossi PRF, Troquay RPT, Libby P, Glynn RJ; CANTOS Trial Group: Antiinflammatory therapy with canakinumab for atherosclerotic disease. *N Engl J Med* 2017; 377:1119–31
  56. Campos M, Schiopu E: Pulmonary arterial hypertension in adult-onset Still's disease: Rapid response to anakinra. *Case Rep Rheumatol* 2012; 2012:537613
  57. Furuya Y, Satoh T, Kuwana M: Interleukin-6 as a potential therapeutic target for pulmonary arterial hypertension. *Int J Rheumatol* 2010; 2010:720305
  58. Hernández-Sánchez J, Harlow L, Church C, Gaine S, Knightbridge E, Bunclark K, Gor D, Bedding A, Morrell N, Corris P, Toshner M: Clinical trial protocol for TRANSFORM-UK: A therapeutic open-label study of tocilizumab in the treatment of pulmonary arterial hypertension. *Pulm Circ* 2018; 8:2045893217735820
  59. Zhang Q, Lenardo MJ, Baltimore D: 30 years of NF- $\kappa$ B: A blossoming of relevance to human pathobiology. *Cell* 2017; 168:37–57
  60. Sawada H, Mitani Y, Maruyama J, Jiang BH, Ikeyama Y, Dida FA, Yamamoto H, Imanaka-Yoshida K, Shimpo H, Mizoguchi A, Maruyama K, Komada Y: A nuclear factor- $\kappa$ B inhibitor pyrrolidine dithiocarbamate ameliorates pulmonary hypertension in rats. *Chest* 2007; 132:1265–74
  61. Price LC, Caramori G, Perros F, Meng C, Gambaryan N, Dorfmüller P, Montani D, Casolari P, Zhu J, Dimopoulos K, Shao D, Girerd B, Mumby S, Proudfoot A, Griffiths M, Papi A, Humbert M, Adcock IM, Wort SJ: Nuclear factor  $\kappa$ -B is activated in the pulmonary vessels of patients with end-stage idiopathic pulmonary arterial hypertension. *PLoS One* 2013; 8:e75415
  62. Chin MP, Bakris GL, Block GA, Chertow GM, Goldsberry A, Inker LA, Heerspink HJL, O'Grady M, Pergola PE, Wanner C, Warnock DG, Meyer CJ: Bardoxolone methyl improves kidney function in patients with chronic kidney disease stage 4 and type 2 diabetes: Post-hoc analyses from Bardoxolone Methyl Evaluation in Patients with Chronic Kidney Disease and Type 2 Diabetes study. *Am J Nephrol* 2018; 47:40–7
  63. Nickel NP, Spiekerkoetter E, Gu M, Li CG, Li H, Kaschwich M, Diebold I, Hennigs JK, Kim KY, Miyagawa K, Wang L, Cao A, Sa S, Jiang X, Stockstill RW, Nicolls MR, Zamanian RT, Bland RD, Rabinovitch M: Elafin reverses pulmonary hypertension via caveolin-1-dependent bone morphogenetic protein signaling. *Am J Respir Crit Care Med* 2015; 191:1273–86
  64. Cowan KN, Heilbut A, Humpl T, Lam C, Ito S, Rabinovitch M: Complete reversal of fatal pulmonary hypertension in rats by a serine elastase inhibitor. *Nat Med* 2000; 6:698–702
  65. Meduri GU, Headley S, Kohler G, Stentz F, Tolley E, Umberger R, Leeper K: Persistent elevation of inflammatory cytokines predicts a poor outcome in ARDS. Plasma IL-1 beta and IL-6 levels are consistent and efficient predictors of outcome over time. *Chest* 1995; 107:1062–73
  66. Rossaint J, Zarbock A: Perioperative inflammation and its modulation by anesthetics. *Anesth Analg* 2018; 126:1058–67
  67. Spiekerkoetter E, Sung YK, Sudheendra D, Bill M, Aldred MA, van de Veerdonk MC, Vonk Noordegraaf A, Long-Boyle J, Dash R, Yang PC, Lawrie A, Swift AJ, Rabinovitch M, Zamanian RT: Low-dose FK506 (tacrolimus) in end-stage pulmonary arterial hypertension. *Am J Respir Crit Care Med* 2015; 192:254–7
  68. Spiekerkoetter E, Tian X, Cai J, Hopper RK, Sudheendra D, Li CG, El-Bizri N, Sawada H, Haghighat R, Chan R, Haghighat L, de Jesus Perez V, Wang L, Reddy S, Zhao M, Bernstein D, Solow-Cordero DE, Beachy PA, Wandless TJ, Ten Dijke P, Rabinovitch M: FK506 activates BMPR2, rescues endothelial dysfunction, and reverses pulmonary hypertension. *J Clin Invest* 2013; 123:3600–13
  69. Gomez-Arroyo J, Abbate A, Voelkel NF: Pulmonary arterial hypertension and the Enigma code of smoldering inflammation. *Eur Respir J* 2016; 48:305–7
  70. Smith JS, Nicholson LT, Suwanpradid J, Glenn RA, Knape NM, Alagesan P, Gundry JN, Wehrman TS, Atwater AR, Gunn MD, MacLeod AS, Rajagopal S: Biased agonists of the chemokine receptor CXCR3 differentially control chemotaxis and inflammation. *Sci Signal* 2018; 11
  71. Chu EK, Drazen JM: Asthma: One hundred years of treatment and onward. *Am J Respir Crit Care Med* 2005; 171:1202–8
